# Supplementary material for: Symmetry Analysis of the Complex Polytypism of Layered Rare-Earth Tellurites and Related Selenites: The Case of Introducing Transition Metals
Source: MDPI journal article supplement (doi:10.3390/sym14102087), 2022-10-07
Supplement: s1 [file s1]

SUPPLEMENTARY MATERIALS

**Table S1.** Fractional site coordinates ( $xyz$ ), site multiplicities ( $Q$ ), equivalent displacement parameters ( $U_{eq}$ , Å<sup>2</sup>) and site occupancy factor for for compounds [Cd<sub>6</sub>Cl<sub>24</sub>][Ce<sub>12</sub>(TeO)<sub>12</sub>] (**1**), [Mn<sub>6</sub>Cl<sub>24</sub>][Nd<sub>12</sub>(TeO)<sub>12</sub>] (**2**), [Mn<sub>6</sub>Br<sub>24</sub>][La<sub>12</sub>(TeO)<sub>12</sub>] (**3**), [Co<sub>6</sub>Cl<sub>24</sub>][Eu<sub>12</sub>(TeO)<sub>12</sub>] (**4**) and [Co<sub>6</sub>Cl<sub>24</sub>][Gd<sub>12</sub>(TeO)<sub>12</sub>] (**5**).

| Cl  |   | $x$        | $y$        | $z$       | $Q$ | $U_{eq/iso}^*$ | s.o.f. |
|-----|---|------------|------------|-----------|-----|----------------|--------|
| Ln1 | 1 | 0.5        | 0.5        | 1         | 2   | 0.0696(1)      | Ce     |
|     | 2 | 0          | 0          | 0         | 2   | 0.0828(1)      | Nd     |
|     | 3 | 0          | 0          | 0         | 2   | 0.0055(5)      | La     |
|     | 4 | 0          | 0          | 0         | 2   | 0.0073(6)      | Eu     |
|     | 5 | 0          | 0          | 0         | 2   | 0.0123(7)      | Gd     |
| Ln2 | 1 | 0.57       | 0.57       | 1         | 4   | 0.0101(1)      | Ce     |
|     | 2 | -1/4       | -1/4       | 0         | 4   | 0.0107(1)      | Nd     |
|     | 3 | 1/4        | 1/4        | 0         | 4   | 0.0073(5)      | La     |
|     | 4 | 1/4        | 1/4        | 0         | 4   | 0.0110(6)      | Eu     |
|     | 5 | 1/4        | 1/4        | 0         | 4   | 0.0168(7)      | Gd     |
| Ln3 | 1 | 0.7530(1)  | 0.5        | 1         | 8   | 0.0923(1)      | Ce     |
|     | 2 | -0.2529(6) | 0          | 0         | 8   | 0.0968(1)      | Nd     |
|     | 3 | 0.2515(1)  | 0          | 0         | 8   | 0.0072(5)      | La     |
|     | 4 | 0.2540(1)  | 0          | 0         | 8   | 0.0105(5)      | Eu     |
|     | 5 | 0.2536(2)  | 0          | 0         | 8   | 0.0160(6)      | Gd     |
| Ln4 | 1 | 0.6218(1)  | 0.1218(1)  | 0.2317(1) | 8   | 0.0141(1)      | Ce     |
|     | 2 | -0.3782(1) | -0.1218(1) | 0.2403(1) | 8   | 0.0124(1)      | Nd     |
|     | 3 | 0.3762(1)  | 0.1238(1)  | 0.2256(2) | 8   | 0.0166(4)      | La     |
|     | 4 | 0.3783(1)  | 0.1217(1)  | 0.2347(2) | 8   | 0.0150(3)      | Eu     |
|     | 5 | 0.3785(1)  | 0.1215(1)  | 0.2355(2) | 8   | 0.0200(3)      | Gd     |
| Ln5 | 1 | 1          | 0.5        | 1         | 2   | 0.0142(2)      | Ce     |
|     | 2 | 0          | -1/2       | 0         | 2   | 0.0136(2)      | Nd     |
|     | 3 | 1/2        | 0          | 0         | 2   | 0.0101(1)      | La     |
|     | 4 | 1/2        | 0          | 0         | 2   | 0.0224(9)      | Eu     |
|     | 5 | 1/2        | 0          | 0         | 2   | 0.0251(9)      | Gd     |
| Te1 | 1 | 0.6434(1)  | 0.3782(1)  | 0.8147(1) | 16  | 0.0871(1)      | Te     |
|     | 2 | -0.1428(1) | -0.1220(1) | 0.1904(4) | 16  | 0.0115(1)      | Te     |
|     | 3 | 0.1436(1)  | 0.1223(1)  | 0.1795(1) | 16  | 0.0162(3)      | Te     |
|     | 4 | 0.1411(1)  | 0.1222(1)  | 0.1920(2) | 16  | 0.0132(3)      | Te     |
|     | 5 | 0.1410(2)  | 0.1220(1)  | 0.1929(2) | 16  | 0.0190(3)      | Te     |
| Te2 | 1 | 0.8853(1)  | 0.6147(1)  | 0.8399(3) | 8   | 0.0103(1)      | Te     |
|     | 2 | -0.3849(2) | 0.1151(1)  | 0.1652(1) | 8   | 0.0128(1)      | Te     |
|     | 3 | 0.6138(1)  | 0.1138(1)  | 0.1592(1) | 8   | 0.0168(3)      | Te     |
|     | 4 | 0.6156(1)  | 0.1156(1)  | 0.1679(3) | 8   | 0.0147(4)      | Te     |
|     | 5 | 0.6157(1)  | 0.1157(1)  | 0.1682(3) | 8   | 0.0189(5)      | Te     |

|    |   |                |                |                |    |           |                    |
|----|---|----------------|----------------|----------------|----|-----------|--------------------|
| M1 | 1 | 0              | 0              | $\frac{1}{2}$  | 2  | 0.248(3)  | Cd                 |
|    | 2 | $-\frac{1}{2}$ | $-\frac{1}{2}$ | $-\frac{1}{2}$ | 2  | 0.0433(1) | Mn <sub>0.72</sub> |
|    | 3 | 0              | 0              | $\frac{1}{2}$  | 2  | 0.098(5)  | Mn <sub>0.8</sub>  |
|    | 4 | 0              | 0              | $\frac{1}{2}$  | 2  | 0.110(8)* | Co <sub>0.88</sub> |
|    | 5 | 0              | 0              | $\frac{1}{2}$  | 2  | 0.089(8)  | Co <sub>0.76</sub> |
| M2 | 1 | $\frac{1}{4}$  | $\frac{1}{4}$  | $\frac{1}{2}$  | 4  | 0.0387(2) | Cd                 |
|    | 2 | $-\frac{1}{4}$ | $-\frac{1}{4}$ | $-\frac{1}{2}$ | 4  | 0.0479(1) | Mn <sub>0.53</sub> |
|    | 3 | 0.75           | $\frac{1}{4}$  | $\frac{1}{2}$  | 4  | 0.0454(1) | Mn                 |
|    | 4 | $\frac{1}{4}$  | $\frac{1}{4}$  | $\frac{1}{2}$  | 4  | 0.085(5)* | Co                 |
|    | 5 | $\frac{1}{4}$  | $\frac{1}{4}$  | $\frac{1}{2}$  | 4  | 0.063(4)  | Co <sub>0.83</sub> |
| M3 | 1 | 0.2458(1)      | 0              | $\frac{1}{2}$  | 8  | 0.0589(1) | Cd <sub>0.70</sub> |
|    | 2 | -0.2528(2)     | $-\frac{1}{2}$ | $-\frac{1}{2}$ | 8  | 0.0313(1) | Mn <sub>0.12</sub> |
|    | 3 | 0.2543(4)      | 0              | $\frac{1}{2}$  | 8  | 0.045(3)  | Mn <sub>0.6</sub>  |
|    | 4 | 0.2428(6)      | 0              | $\frac{1}{2}$  | 8  | 0.069(4)* | Co <sub>0.78</sub> |
|    | 5 | 0.2441(7)      | 0              | $\frac{1}{2}$  | 8  | 0.095(6)  | Co <sub>0.89</sub> |
| O1 | 1 | 0.7517(1)      | 0.3774(1)      | 0.8677(3)      | 16 | 0.0119(8) | O                  |
|    | 2 | -0.2533(2)     | -0.1241(2)     | 0.1367(4)      | 16 | 0.0146(1) | O                  |
|    | 3 | 0.2526(5)      | 0.1233(5)      | 0.1294(1)      | 16 | 0.0114(1) | O                  |
|    | 4 | 0.2531(6)      | 0.1255(7)      | 0.136(1)       | 16 | 0.013(3)  | O                  |
|    | 5 | 0.2538(7)      | 0.1254(8)      | 0.137(1)       | 16 | 0.022(4)  | O                  |
| O2 | 1 | 0.8585(1)      | 0.6415(1)      | 0.9659(4)      | 8  | 0.0162(1) | O                  |
|    | 2 | -0.3616(3)     | 0.1384(3)      | 0.0248(1)      | 8  | 0.0188(1) | O                  |
|    | 3 | 0.6366(1)      | 0.1366(1)      | 0.0255(1)      | 8  | 0.024(3)  | O                  |
|    | 4 | 0.6420(8)      | 0.1420(8)      | 0.022(1)       | 8  | 0.020(4)  | O                  |
|    | 5 | 0.642(1)       | 0.142(1)       | 0.027(2)       | 8  | 0.036(6)  | O                  |
| O3 | 1 | 0.7116(1)      | 0.6192(1)      | 0.9001(2)      | 16 | 0.0128(1) | O                  |
|    | 2 | -0.1207(2)     | -0.214(2)      | 0.126(3)       | 16 | 0.0133(1) | O                  |
|    | 3 | 0.1221(1)      | 0.2114(1)      | 0.0977(1)      | 16 | 0.021(1)  | O                  |
|    | 4 | 0.1205(7)      | 0.2146(7)      | 0.1010(9)      | 16 | 0.012(2)* | O                  |
|    | 5 | 0.1206(7)      | 0.2169(8)      | 0.104(1)       | 16 | 0.022(4)  | O                  |
| O4 | 1 | 0.8771(1)      | 0.5026(1)      | 0.8754(3)      | 16 | 0.0138(1) | O                  |
|    | 2 | -0.3777(2)     | 0.0002(2)      | 0.1260(3)      | 16 | 0.0112(1) | O                  |
|    | 3 | 0.6223(1)      | 0.0009(1)      | 0.1216(1)      | 16 | 0.019(2)  | O                  |
|    | 4 | 0.6239(8)      | 0.0011(6)      | 0.126(1)       | 16 | 0.017(4)  | O                  |
|    | 5 | 0.6227(9)      | 0.0005(7)      | 0.121(1)       | 16 | 0.020(4)  | O                  |
| O5 | 1 | 0.6223(1)      | 0.4677(1)      | 0.9006(3)      | 16 | 0.0133(1) | O                  |
|    | 2 | -0.1236(2)     | -0.0328(2)     | 0.0994(3)      | 16 | 0.0137(1) | O                  |
|    | 3 | 0.1225(6)      | 0.0351(1)      | 0.0975(1)      | 16 | 0.022(2)  | O                  |
|    | 4 | 0.1242(7)      | 0.0297(7)      | 0.102(1)       | 16 | 0.016(4)  | O                  |

|           |          |                |                |                |    |           |    |
|-----------|----------|----------------|----------------|----------------|----|-----------|----|
|           | <b>5</b> | 0.1223(7)      | 0.0319(7)      | 0.1000(8)      | 16 | 0.011(2)* | O  |
| <i>X1</i> | <b>1</b> | 0.1302(1)      | 0.1302(1)      | $\frac{1}{2}$  | 8  | 0.0508(9) | Cl |
|           | <b>2</b> | -0.3771(1)     | -0.3771(1)     | $-\frac{1}{2}$ | 8  | 0.0537(1) | Cl |
|           | <b>3</b> | 0.8709(1)      | 0.1292(1)      | $\frac{1}{2}$  | 8  | 0.0530(1) | Br |
|           | <b>4</b> | 0.1285(6)      | 0.1285(6)      | $\frac{1}{2}$  | 8  | 0.072(4)  | Cl |
|           | <b>5</b> | 0.1277(6)      | 0.1277(6)      | $\frac{1}{2}$  | 8  | 0.073(4)* | Cl |
| <i>X2</i> | <b>1</b> | 0.2556(1)      | 0.0353(1)      | 0.3180(1)      | 16 | 0.0362(5) | Cl |
|           | <b>2</b> | 0.2436         | -0.4           | -0.3           | 16 | 0.0448    | Cl |
|           | <b>3</b> | 0.2553(1)      | 0.9951(1)      | 0.3101(2)      | 16 | 0.0227(5) | Br |
|           | <b>4</b> | 0.2568(4)      | 0.9989(3)      | 0.3246(8)      | 16 | 0.034(3)  | Cl |
|           | <b>5</b> | 0.2582(4)      | 0.9980(3)      | 0.3258(8)      | 16 | 0.040(3)  | Cl |
| <i>X3</i> | <b>1</b> | 0.3663(1)      | 0.1339(1)      | 0.5210(3)      | 8  | 0.0524(1) | Cl |
|           | <b>2</b> | -0.1318(1)     | -0.3683(1)     | -0.4779(4)     | 8  | 0.0701(1) | Cl |
|           | <b>3</b> | 0.6336(1)      | 0.1336(1)      | 0.5191(1)      | 8  | 0.0300(5) | Br |
|           | <b>4</b> | 0.3692(5)      | 0.1308(5)      | 0.4804(8)      | 8  | 0.061(3)  | Cl |
|           | <b>5</b> | 0.3681(5)      | 0.1319(5)      | 0.4826(9)      | 8  | 0.058(3)* | Cl |
| <i>X4</i> | <b>1</b> | $\frac{1}{2}$  | 0              | 0.3311(1)      | 4  | 0.0486(1) | Cl |
|           | <b>2</b> | $-\frac{1}{2}$ | 0              | 0.3254(4)      | 4  | 0.0305(1) | Cl |
|           | <b>3</b> | $\frac{1}{2}$  | 0              | 0.3233(3)      | 4  | 0.0194(1) | Br |
|           | <b>4</b> | $\frac{1}{2}$  | 0              | 0.328(1)       | 4  | 0.040(3)  | Cl |
|           | <b>5</b> | $\frac{1}{2}$  | 0              | 0.326(1)       | 4  | 0.043(4)  | Cl |
| <i>X5</i> | <b>1</b> | 0              | 0              | 0.3229(1)      | 4  | 0.9352(1) | Cl |
|           | <b>2</b> | $-\frac{1}{2}$ | $-\frac{1}{2}$ | -0.3158(4)     | 4  | 0.0297(1) | Cl |
|           | <b>3</b> | 0              | 0              | 0.3216(3)      | 4  | 0.0171(1) | Br |
|           | <b>4</b> | 0              | 0              | 0.3263(9)      | 4  | 0.029(3)  | Cl |
|           | <b>5</b> | 0              | 0              | 0.3258(8)      | 4  | 0.032(3)  | Cl |
| <i>X6</i> | <b>1</b> | 0.2524(1)      | 0.2477(1)      | 0.3099(1)      | 8  | 0.0229(1) | Cl |
|           | <b>2</b> | 0.2472(1)      | -0.2529(1)     | -0.3221(1)     | 8  | 0.0417(1) | Cl |
|           | <b>3</b> | 0.7454(1)      | 0.2454(1)      | 0.3101(2)      | 8  | 0.0188(1) | Br |
|           | <b>4</b> | 0.2484(3)      | 0.2516(3)      | 0.322(1)       | 8  | 0.041(3)  | Cl |
|           | <b>5</b> | 0.2491(3)      | 0.2509(3)      | 0.3221(8)      | 8  | 0.035(3)* | Cl |

**Table S2.** Selected interatomic distances (Å) for compounds **1 - 5**.

| Bond        |    | Length [Å]   |              |              |               |               |
|-------------|----|--------------|--------------|--------------|---------------|---------------|
|             |    | 1            | 2            | 3            | 4             | 5             |
| <i>Ln1</i>  | O5 | 2.42(2) × 8  | 2.411(1) × 8 | 2.473(4) × 8 | 2.394(12) × 8 | 2.358(11) × 8 |
| <i>mean</i> |    | 2.42         | 2.411        | 2.473        | 2.394         | 2.358         |
| <i>Ln2</i>  | O2 | 2.529(2) × 2 | 2.555(3) × 2 | 2.661(3) × 2 | 2.443(13) × 2 | 2.441(16) × 2 |
|             | O3 | 2.591(3) × 4 | 2.509(2) × 4 | 2.564(3) × 4 | 2.477(11) × 4 | 2.478(13) × 4 |
|             | O1 | 2.709(3) × 4 | 2.665(2) × 4 | 2.719(3) × 4 | 2.607(11) × 4 | 2.612(13) × 4 |
| <i>mean</i> |    | 2.626        | 2.401        | 2.645        | 2.522         | 2.524         |
| <i>Ln3</i>  | O3 | 2.433(3) × 2 | 2.407(5) × 2 | 2.489(2) × 2 | 2.376(11) × 2 | 2.378(13) × 2 |
|             | O5 | 2.599(1) × 2 | 2.487(1) × 2 | 2.562(4) × 2 | 2.468(12) × 2 | 2.477(11) × 2 |
|             | O4 | 2.556(2) × 2 | 2.563(2) × 2 | 2.647(3) × 2 | 2.497(13) × 2 | 2.470(14) × 2 |
|             | O1 | 2.654(4) × 2 | 2.642(1) × 2 | 2.675(3) × 2 | 2.619(12) × 2 | 2.621(14) × 2 |
|             | O2 | 2.898(4) × 2 | 2.399(1) × 2 | 2.923(2) × 2 | 2.811(13) × 2 | 2.810(16) × 2 |
| <i>mean</i> |    | 2.628        | 2.450        | 2.659        | 2.554         | 2.551         |
| <i>Ln4</i>  | O1 | 2.443(1) × 2 | 2.399(2) × 2 | 2.412(1) × 2 | 2.339(12) × 2 | 2.325(12) × 2 |
|             | O4 | 2.458(2) × 2 | 2.438(1) × 2 | 2.485(1) × 2 | 2.375(13) × 2 | 2.405(12) × 2 |
|             | X2 | 3.066(1) × 2 | 2.987(1) × 2 | 3.150(3) × 2 | 2.965(7) × 2  | 2.953(7) × 2  |
|             | X4 | 3.089(2)     | 2.971(1)     | 3.167(4)     | 2.971(5)      | 2.944(5)      |
|             | X3 | 3.232(3)     | 3.022(5)     | 3.456(6)     | 3.069(10)     | 3.091(12)     |
|             | X6 | 3.177(3)     | 3.155(3)     | 3.248(5)     | 3.118(6)      | 3.092(6)      |
|             | O2 | 3.362(1)     | 3.381(4)     | 3.404(4)     |               |               |
| <i>mean</i> |    | 2.879        | 2.818        | 2.937        | 2.724         | 2.721         |
| <i>Ln5</i>  | O4 | 2.604(1) × 8 | 2.533(1) × 8 | 2.593(2) × 8 | 2.519(11) × 8 | 2.458(12) × 8 |
|             | O2 | 3.277(2) × 4 | 3.161(1) × 4 | 3.192(2) × 4 | 3.204(13) × 4 | 3.197(16) × 4 |
| <i>mean</i> |    | 2.828        | 2.742        | 2.793        | 2.747         | 2.704         |
| <i>Te1</i>  | O5 | 1.878(1)     | 1.866(1)     | 1.846(3)     | 1.869(12)     | 1.861(11)     |
|             | O3 | 1.877(3)     | 1.896(1)     | 1.868(2)     | 1.884(11)     | 1.898(13)     |
|             | O4 | 1.878(3)     | 1.903(2)     | 1.917(3)     | 1.912(10)     | 1.917(12)     |
| <i>mean</i> |    | 1.878        | 1.888        | 1.877        | 1.888         | 1.892         |
| <i>Te2</i>  | O4 | 1.883(1) × 2 | 1.915(3) × 2 | 1.932(2) × 2 | 1.897(13) × 2 | 1.920(14) × 2 |
|             | O2 | 1.876(2)     | 1.859(3)     | 1.881(3)     | 1.910(16)     | 1.860(20)     |
| <i>mean</i> |    | 1.881        | 1.896        | 1.915        | 1.901         | 1.900         |
| <i>M1a</i>  | X5 | 2.308(5) × 2 | 2.336(2) × 2 | 2.409(5) × 2 | 2.165(11) × 2 | 2.173(10) × 2 |
|             | X1 | 3.013(3) × 4 | 2.793(2) × 4 | 3.002(4) × 4 | 2.888(10) × 4 | 2.859(10) × 4 |
| <i>mean</i> |    | 2.778        | 2.641        | 2.804        | 2.647         | 2.630         |
| <i>M1b</i>  | X1 |              | 1.975(4) × 2 | 2.144(3) × 2 |               |               |
|             | X5 |              | 3.039(3) × 2 | 3.022(4) × 2 |               |               |
|             | X2 |              | 3.147(1) × 2 | 3.462(4) × 2 |               |               |

|             |    |                     |                     |                     |                      |                      |
|-------------|----|---------------------|---------------------|---------------------|----------------------|----------------------|
| <i>mean</i> |    |                     | 2.720               | 2.876               |                      |                      |
| <i>M2a</i>  | X6 | $2.492(2) \times 2$ | $2.256(3) \times 2$ | $2.568(1) \times 2$ | $2.215(13) \times 2$ | $2.219(10) \times 2$ |
|             | X3 | $2.691(3) \times 2$ | $2.701(4) \times 2$ | $2.717(2) \times 2$ | $2.690(8) \times 2$  | $2.653(8) \times 2$  |
|             | X1 | $2.759(1) \times 2$ | $2.888(4) \times 2$ | $2.810(1) \times 2$ | $2.731(10) \times 2$ | $2.738(10) \times 2$ |
| <i>mean</i> |    | 2.647               | 2.615               | 2.698               | 2.545                | 2.536                |
| <i>M2b</i>  | X3 |                     | 1.916(1)            |                     |                      |                      |
|             | X1 |                     | 2.108(4)            |                     |                      |                      |
|             | X2 |                     | 2.780(1)            |                     |                      |                      |
|             | X6 |                     | 2.918(2)            |                     |                      |                      |
|             | X2 |                     | 3.146(2)            |                     |                      |                      |
|             | X6 |                     | 3.269(3)            |                     |                      |                      |
| <i>mean</i> |    |                     | 2.689               |                     |                      |                      |
| <i>M3a</i>  | X2 | $2.39(3) \times 2$  | $2.278(3) \times 2$ | $2.567(3) \times 2$ | $2.197(10) \times 2$ | $2.184(10) \times 2$ |
|             | X1 | $2.847(3) \times 2$ | $2.808(5) \times 2$ | $2.957(4) \times 2$ | $2.733(11) \times 2$ | $2.736(12) \times 2$ |
|             | X3 | $2.948(1) \times 2$ | $2.889(4) \times 2$ | $2.879(4) \times 2$ | $2.901(10) \times 2$ | $2.874(11) \times 2$ |
| <i>mean</i> |    | 2.728               | 2.658               | 2.801               | 2.610                | 2.598                |
| <i>M3b</i>  | X3 | $2.206(3) \times 2$ | $2.136(3) \times 2$ |                     |                      |                      |
|             | X2 | $3.01(2) \times 2$  | $2.909(3) \times 2$ |                     |                      |                      |
|             | X4 | $3.087(1) \times 2$ | $3.051(1) \times 2$ |                     |                      |                      |
| <i>mean</i> |    | 2.767               | 2.670               |                     |                      |                      |
